# Supplementary material for: Mathematical Modeling of Oncolytic Virus Therapy Reveals Role of the Immune Response
Source: MDPI journal article supplement (doi:10.3390/v15091812), 2023-08-25
Supplement: s1 [file s1]

# Mathematical Modeling of Oncolytic Virus Therapy Reveals Role of the Immune Response: Supplementary Documents

Ela Guo, Hana M. Dobrovolny

July 1, 2023

## 1 Basic reproductive number

The basic reproductive number,  $R_0$ , was calculated based off the work of Diekmann et. al. using Next Generation Matrices (NGM) [1].

Transmission Matrix (T)

$$\begin{pmatrix} 0 & 0 & \beta T_0 \\ 0 & 0 & 0 \\ 0 & 0 & 0 \end{pmatrix}$$

Transition Matrix ( $\Sigma$ )

$$\begin{pmatrix} -k & 0 & 0 \\ 0 & -\delta & 0 \\ 0 & \frac{p}{1+\epsilon F} & -c \end{pmatrix}$$

$-T\Sigma^{-1} =$

$$\begin{pmatrix} 0 & \frac{\beta T p}{\delta c(1+\epsilon F)} & \frac{\beta T}{c} \\ 0 & 0 & 0 \\ 0 & 0 & 0 \end{pmatrix}$$

Dominant eigenvalue of  $-T\Sigma^{-1}$ :  $\frac{\beta T p}{\delta c(1+\epsilon F)}$

## 2 Corner Plots

The following plots show correlation relationships between the parameters, as well as parameter histograms. Plots were made using the `corner.py` package of Python [2].

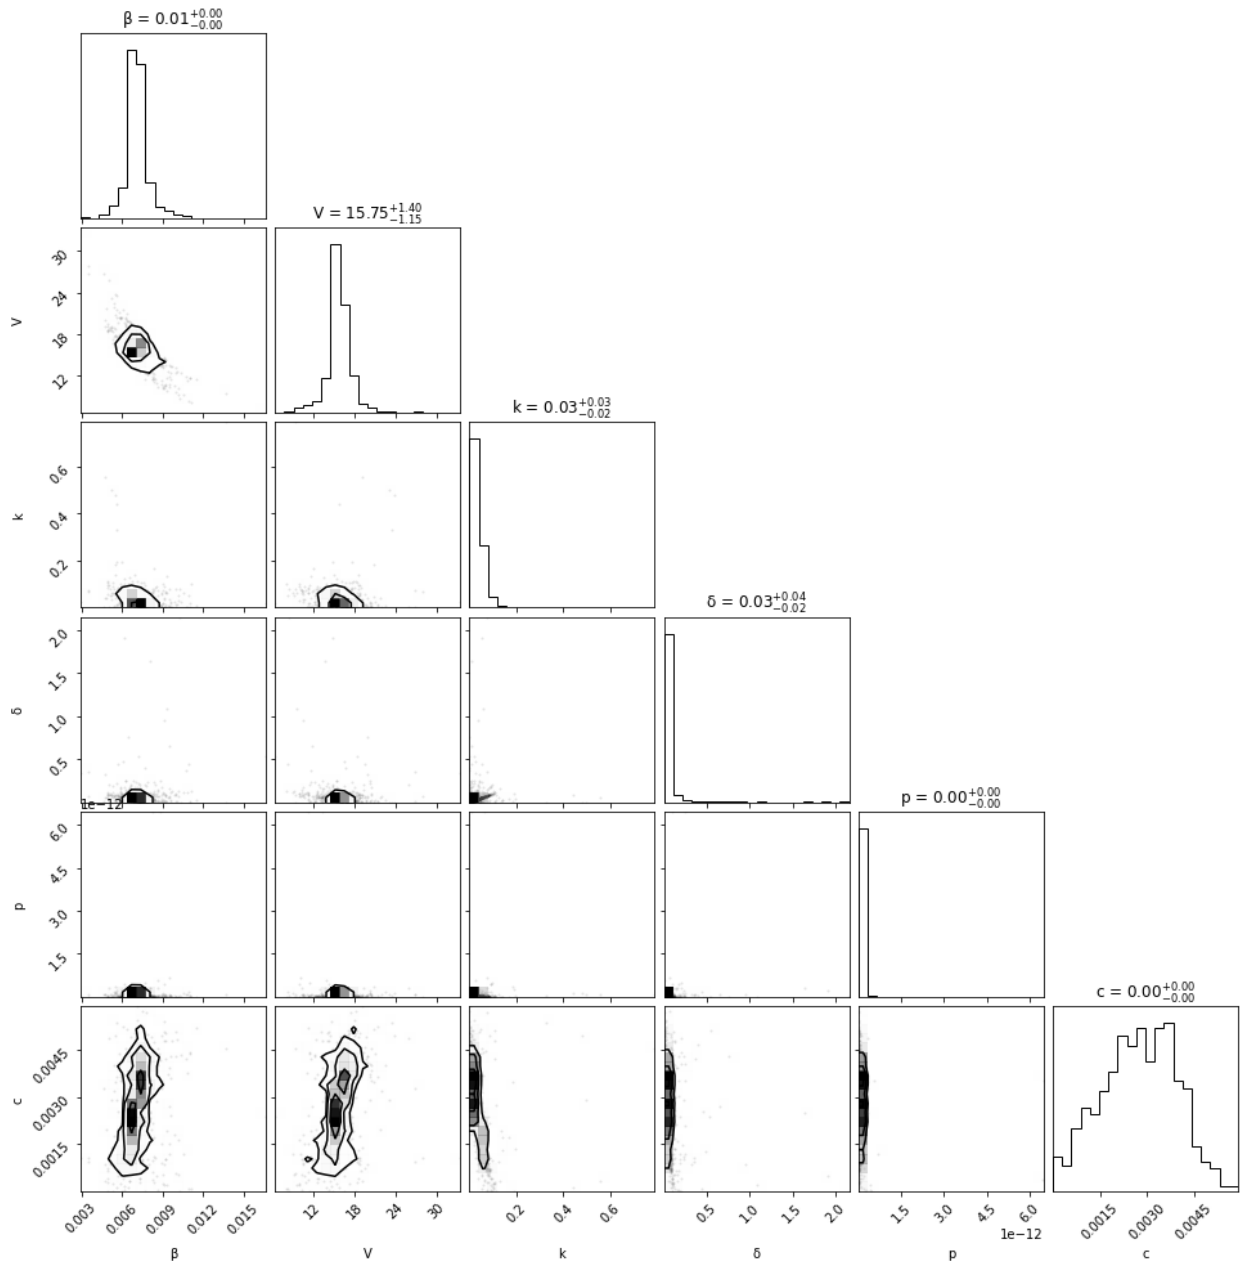

Figure 1: Ad1d24.P19 no immune response.

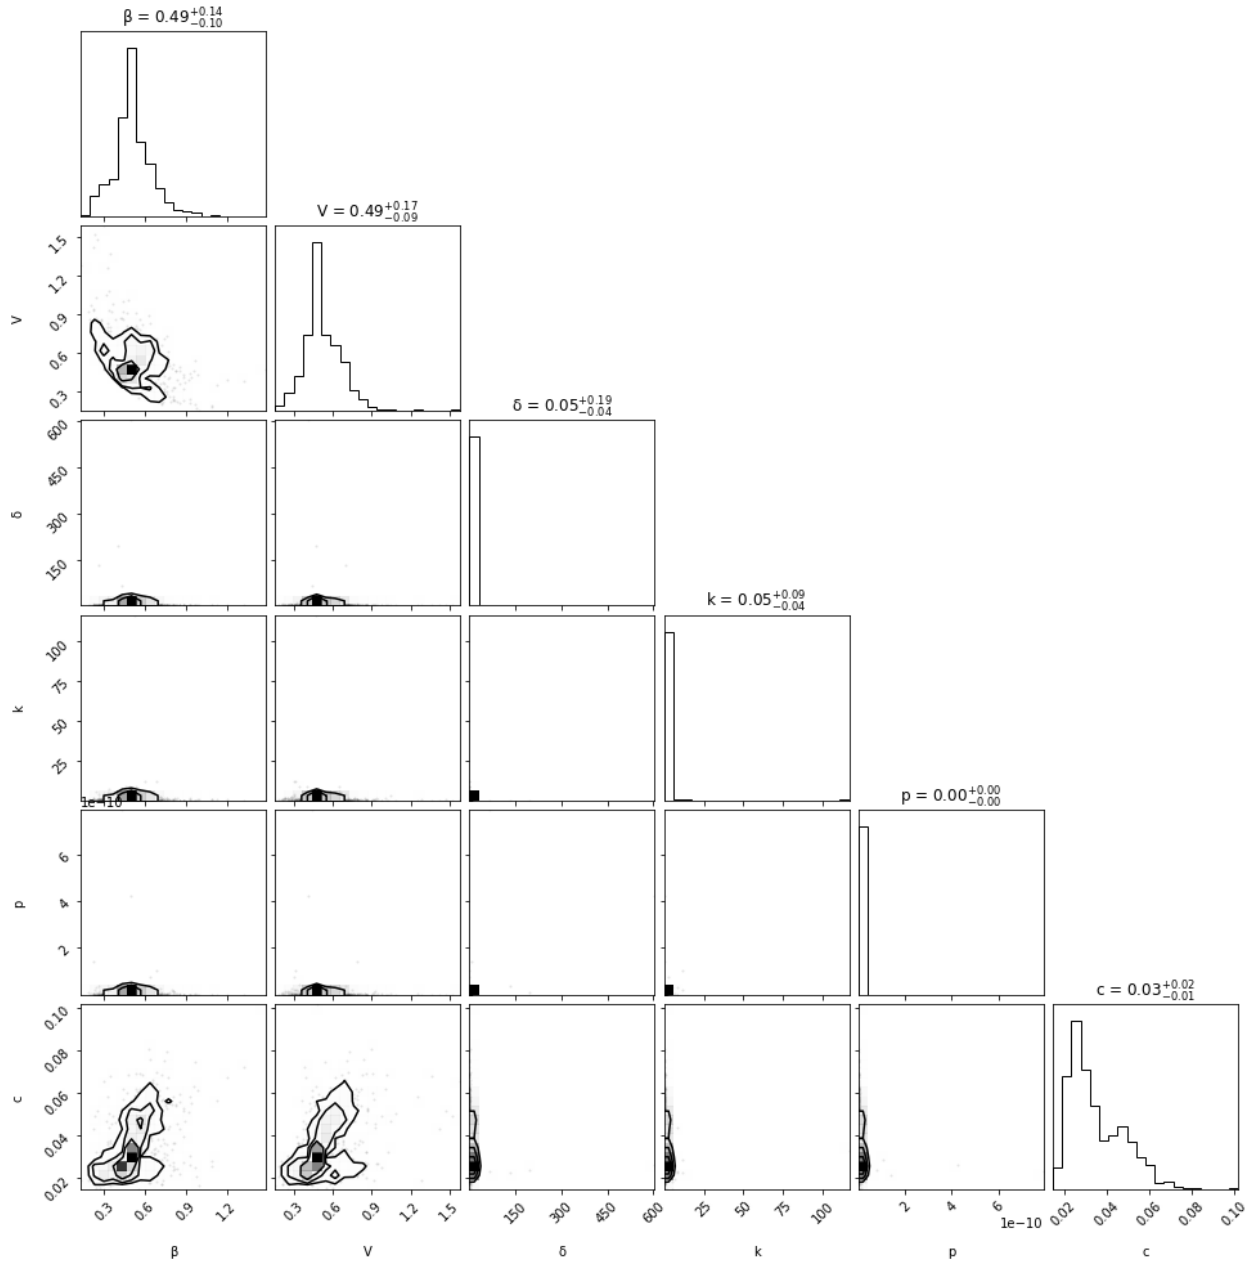

Figure 2: Ad2d24.P19 no immune response.

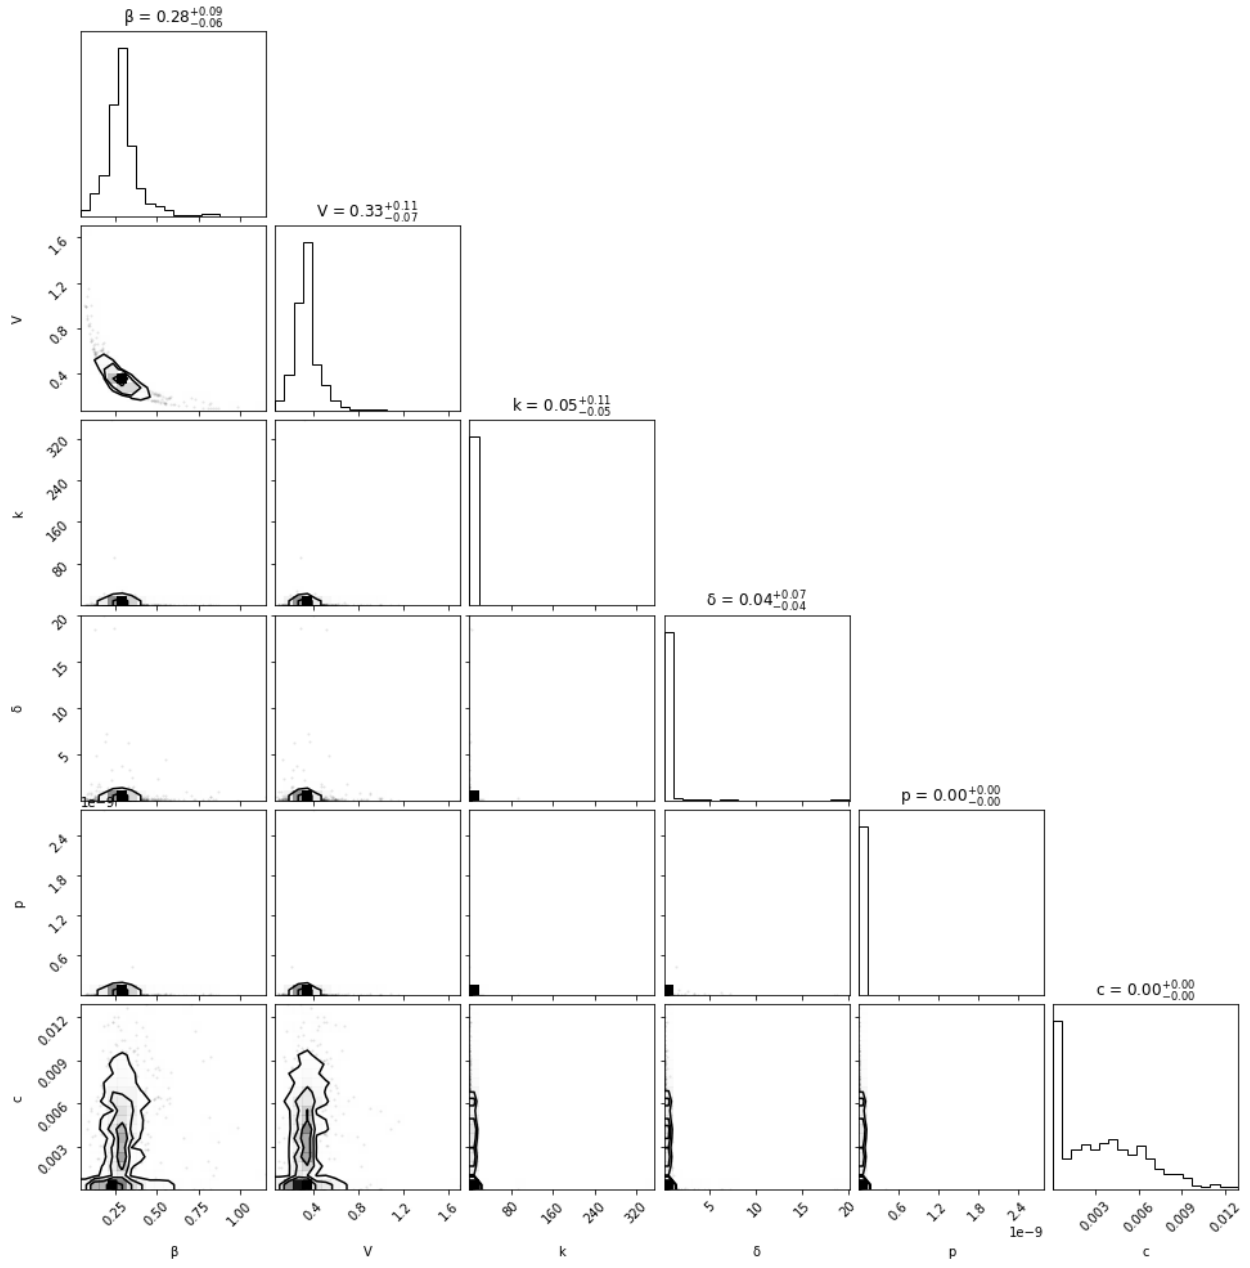

Figure 3: Ad5d24.P19 no immune response.

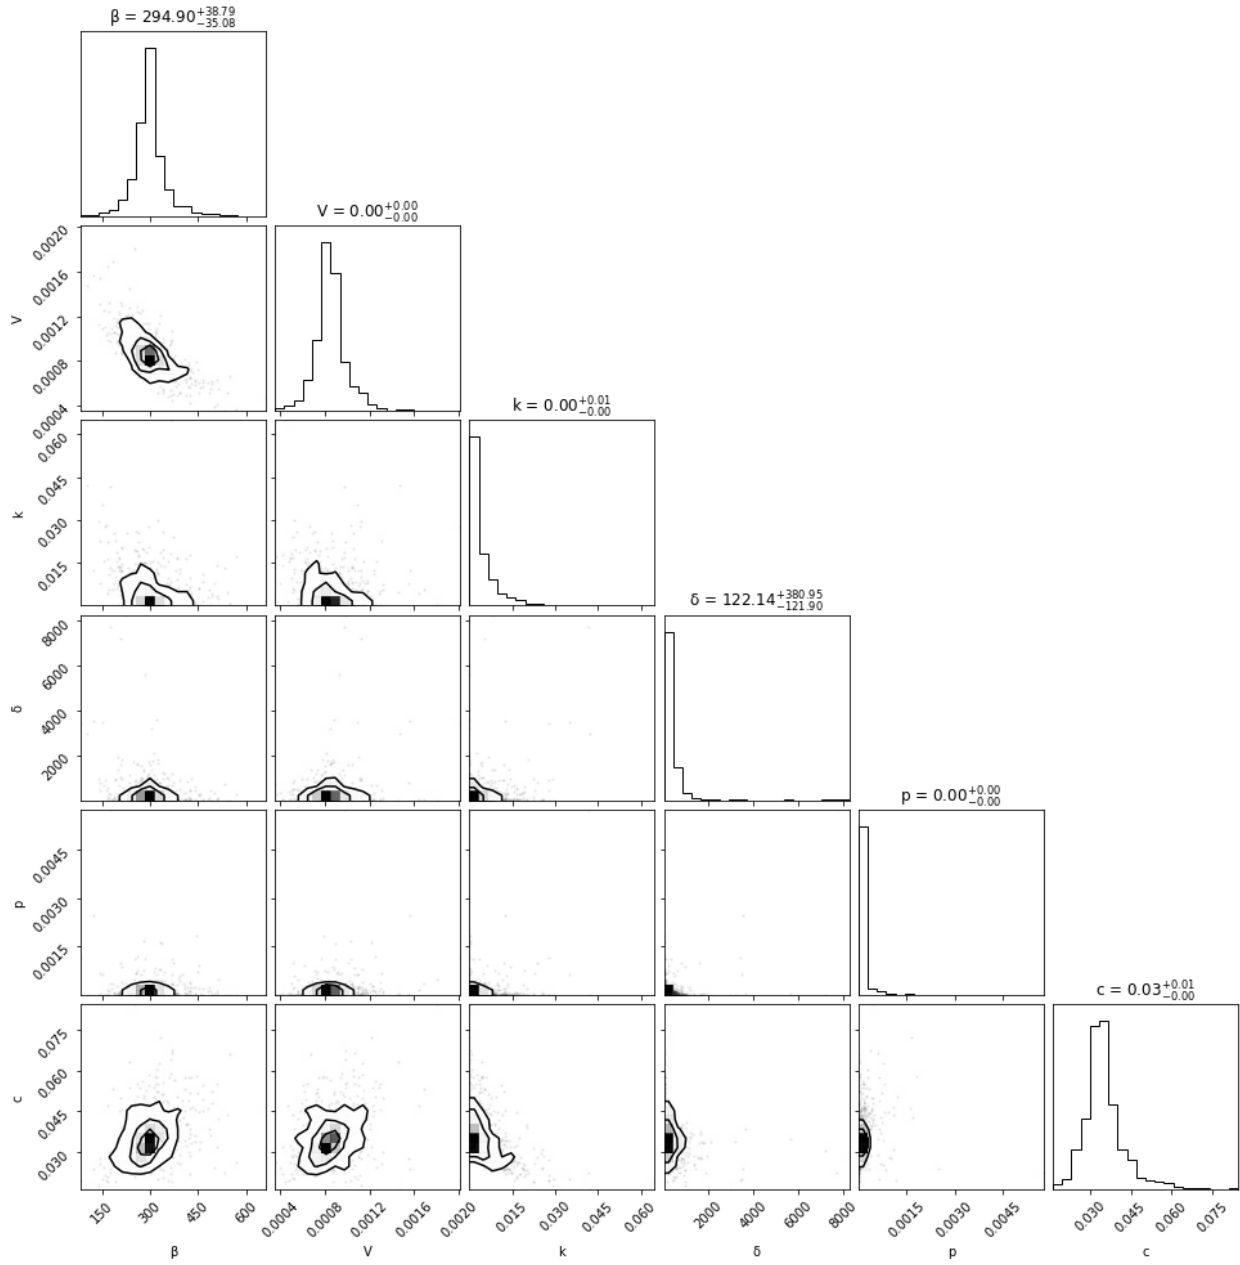

Figure 4: Ad6d24.P19 no immune response.

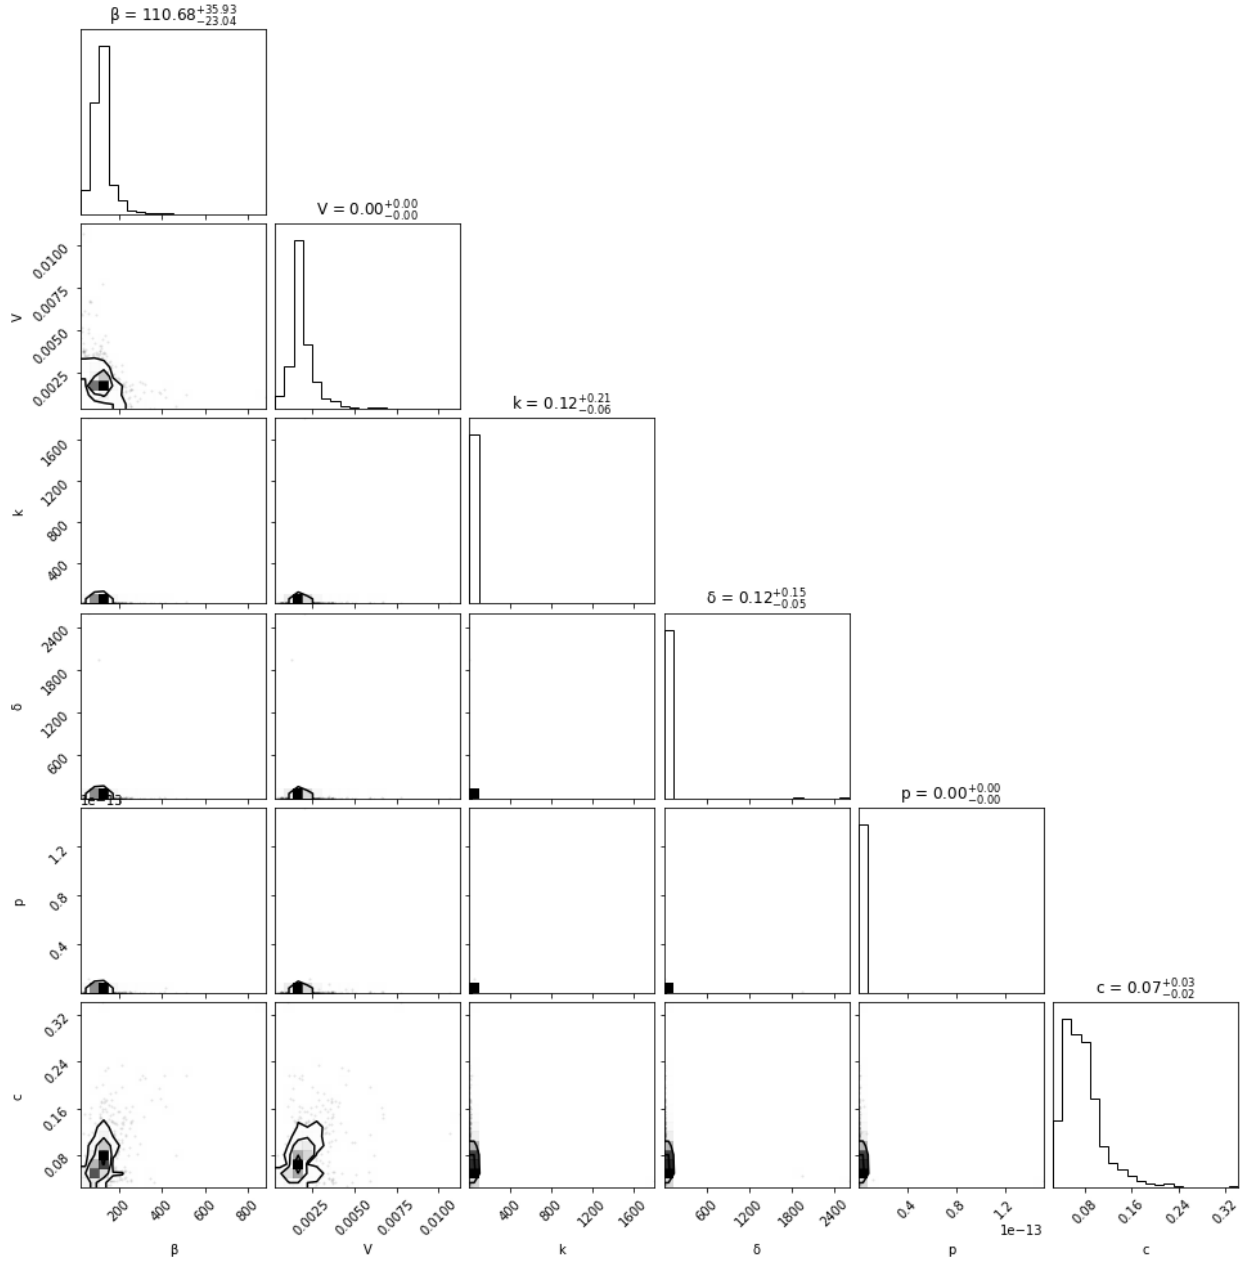

Figure 5: H101 no immune response.

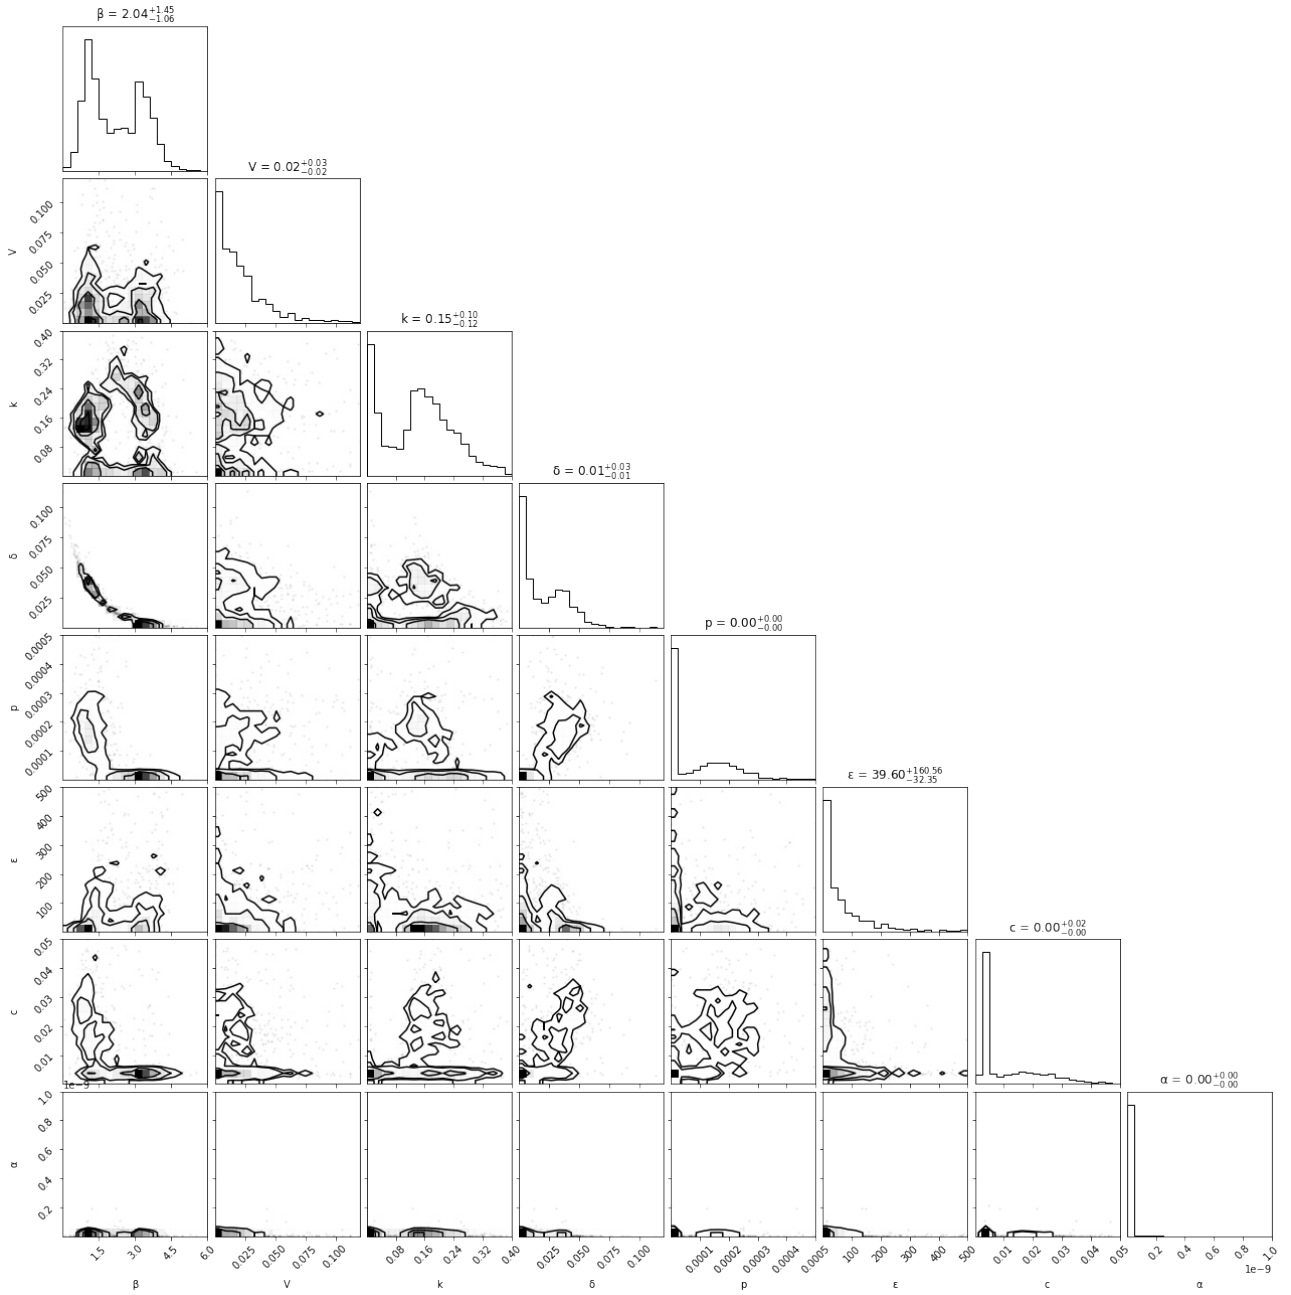

Figure 6: Ad1d24.P19 with immune response.

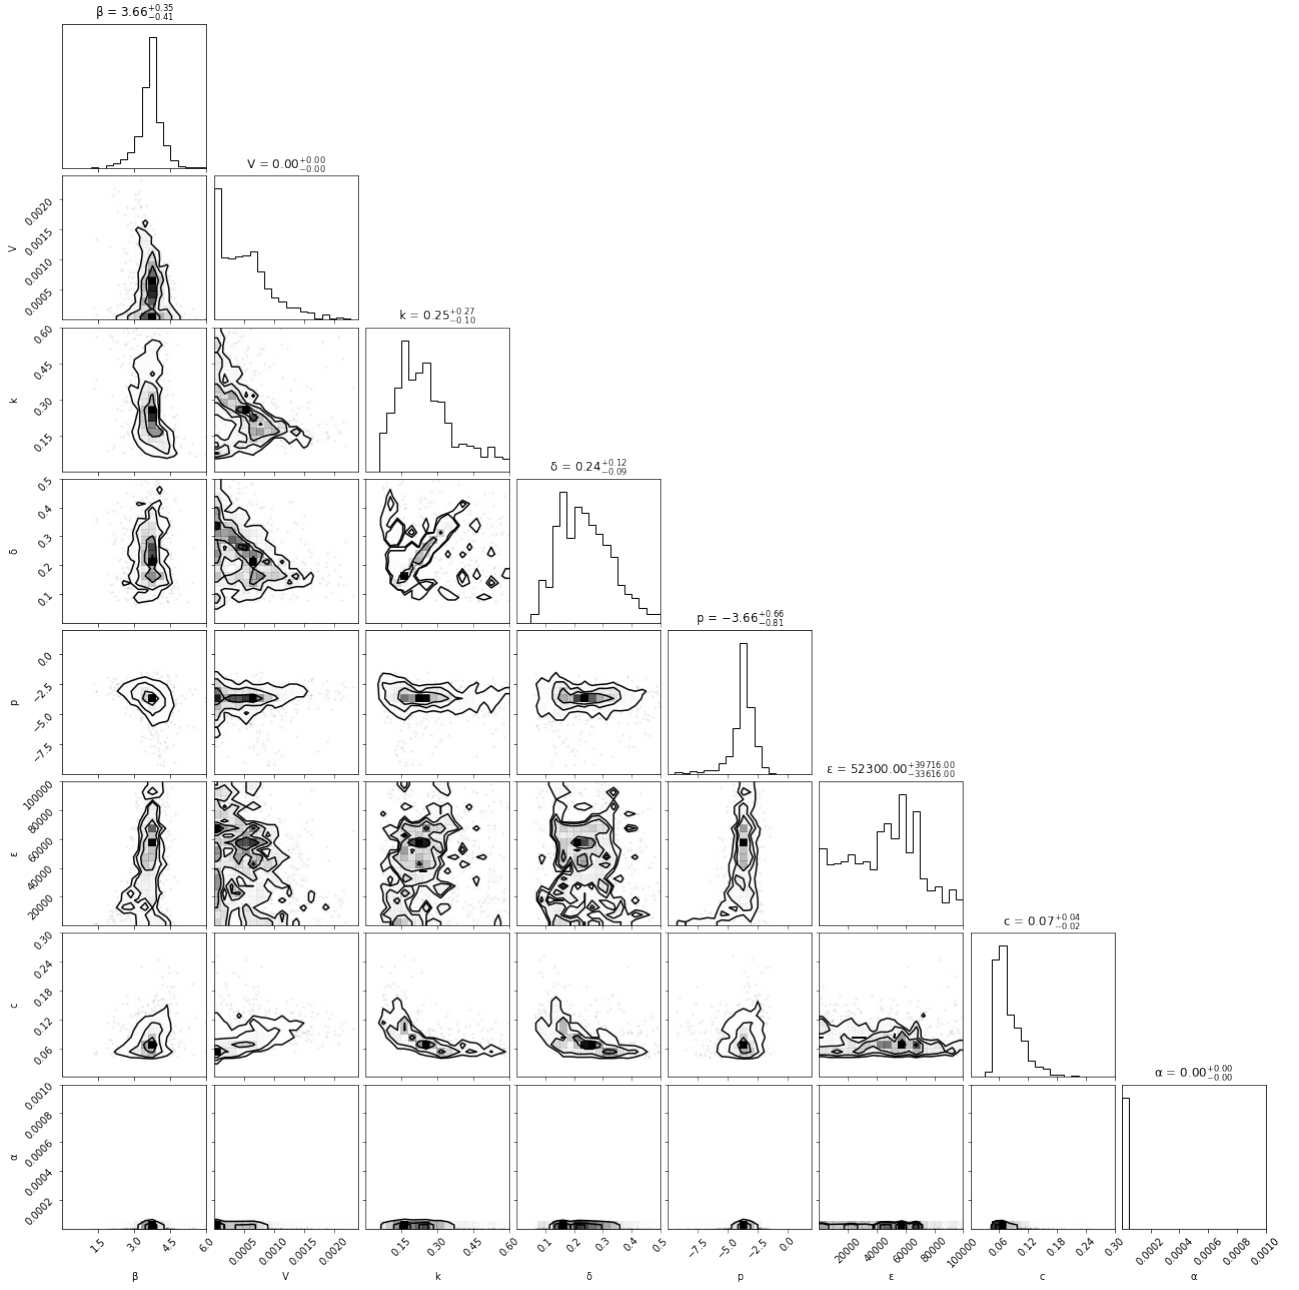

Figure 7: Ad2d24.P19 with immune response.



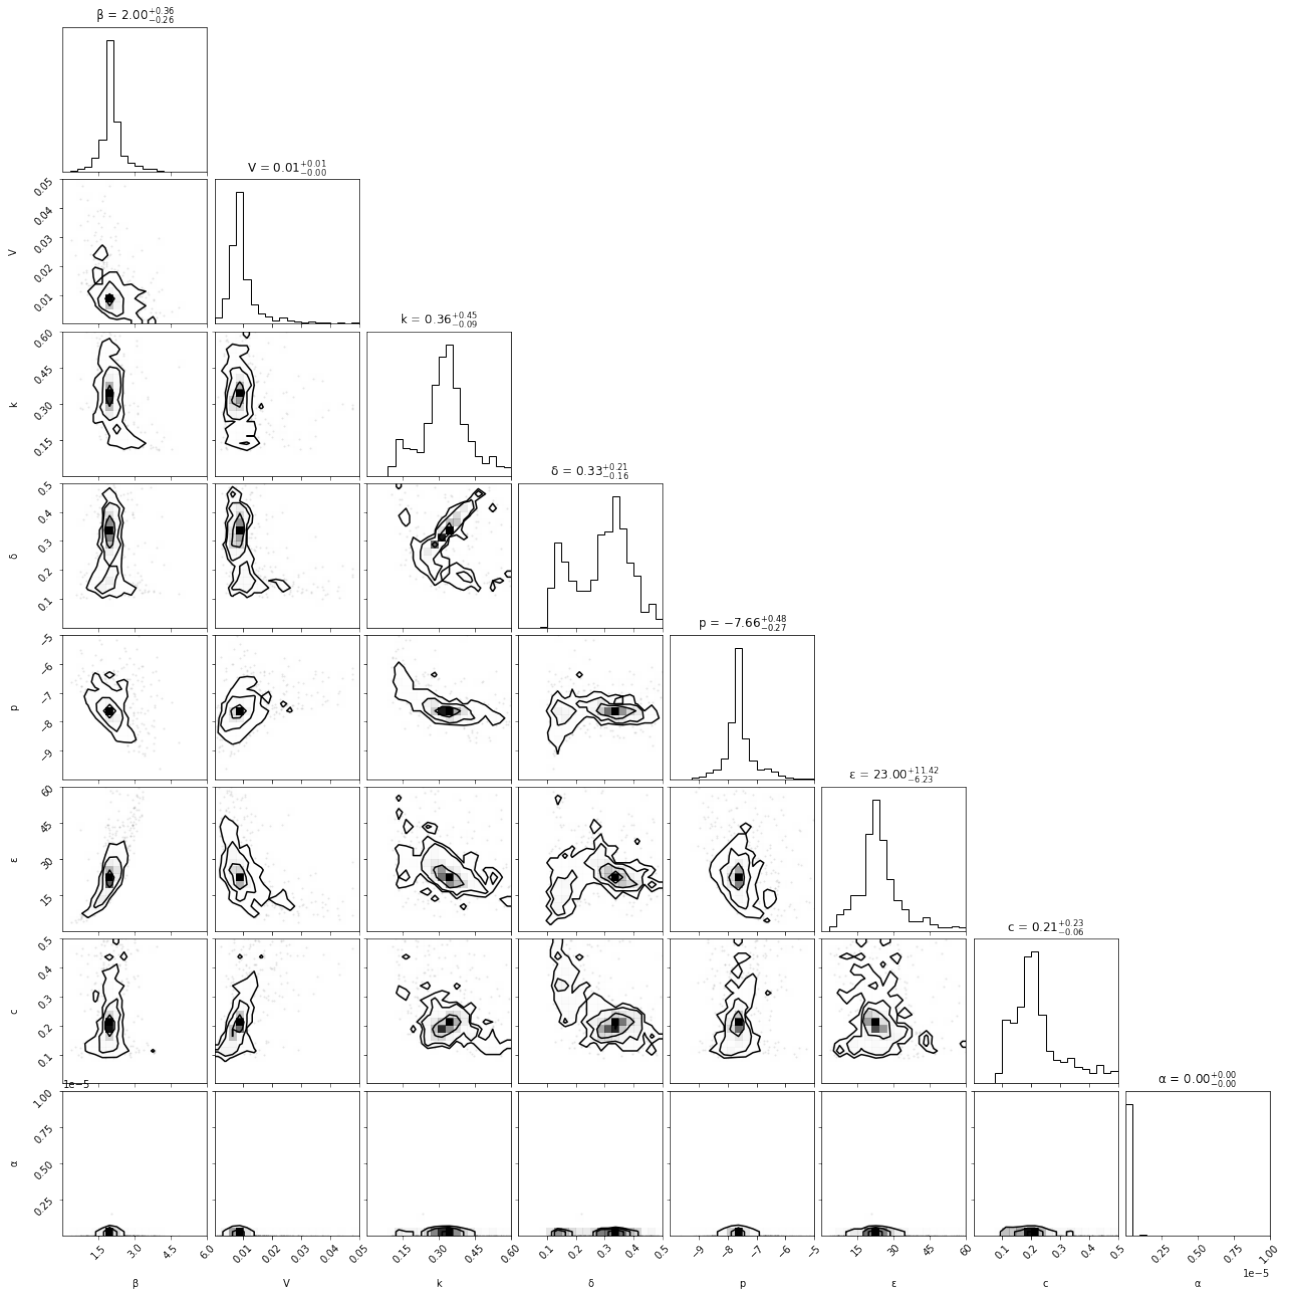

Figure 8: Ad5d24.P19 with immune response.

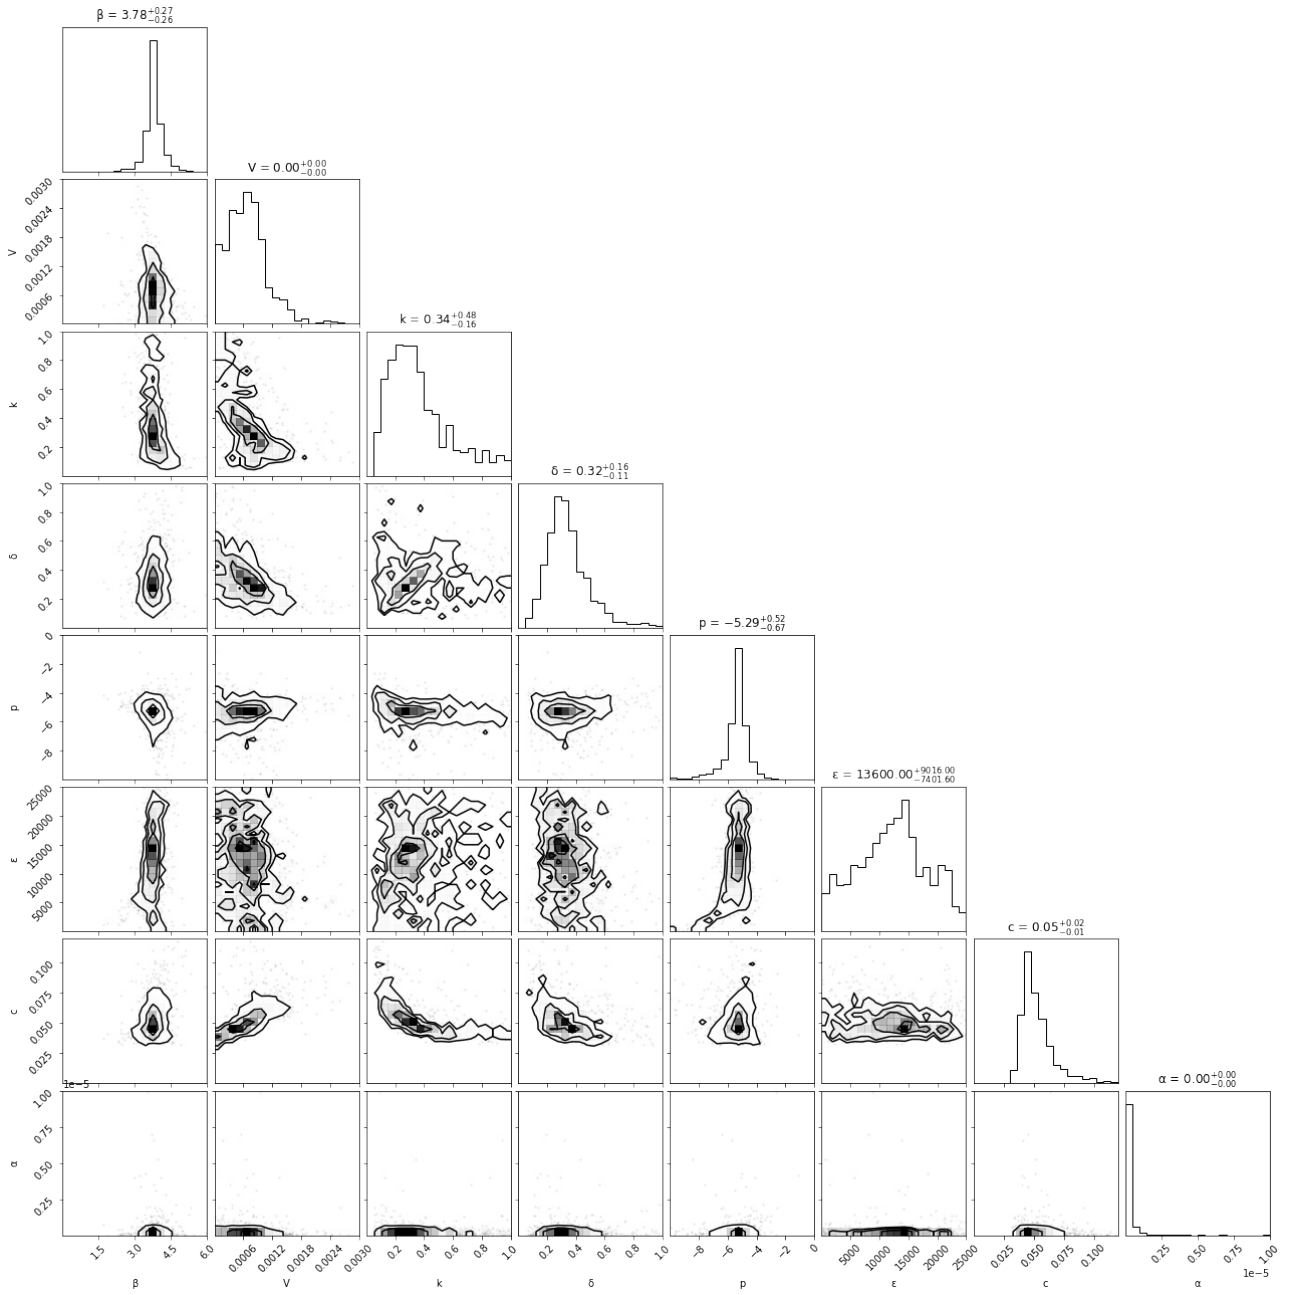

Figure 9: Ad6d24.P19 with immune response.

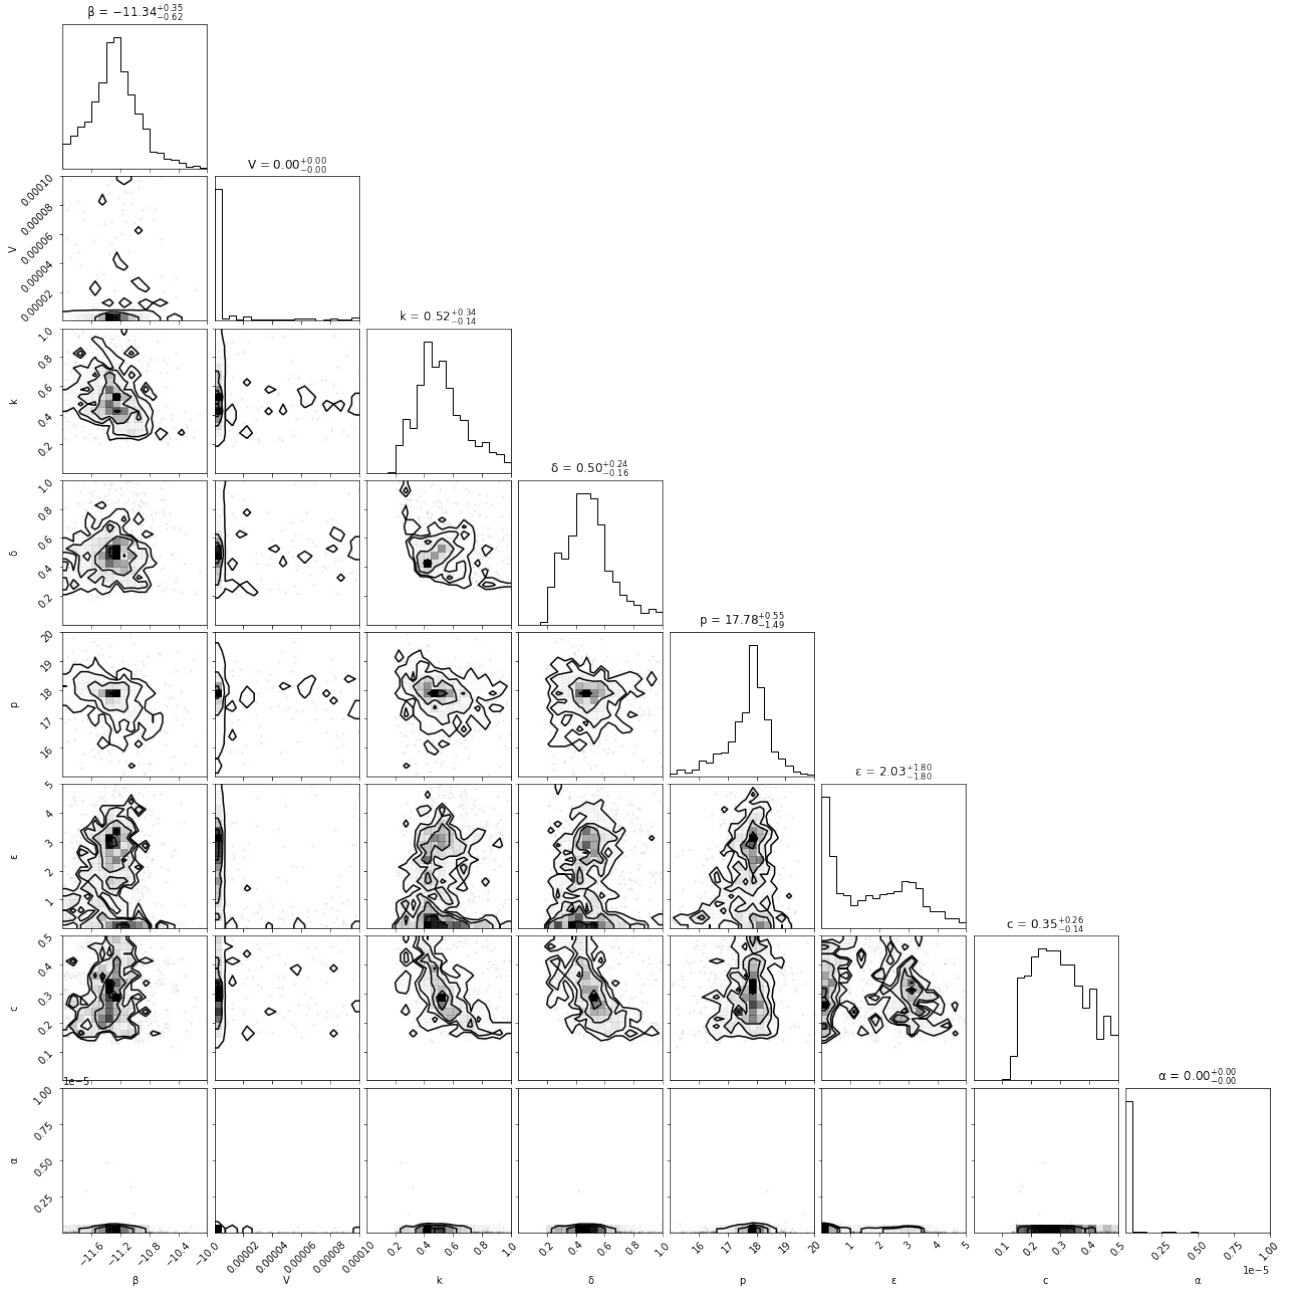

Figure 10: H101 with immune response.

## 2.1 Mann-Whitney Test tables

The following tables give p-values for the pair-wise comparisons of parameter estimates for different viral strains. p values less than 0.05 are considered significant and are shown in bold.

Table 1: p-values of  $\beta$

|            | Ad2d24.P19  | Ad5.P19      | Ad6d24.P19    | H101          |
|------------|-------------|--------------|---------------|---------------|
| Ad1d24.P19 | <b>0.03</b> | 0.46         | <b>0.01</b>   | <b>0.0002</b> |
| Ad2d24.P19 |             | <b>0.001</b> | 0.41          | <b>0.0002</b> |
| Ad5.P19    |             |              | <b>0.0008</b> | <b>0.0002</b> |
| Ad6d24.P19 |             |              |               | <b>0.0002</b> |

Table 2: p-values of  $V$

|            | Ad2d24.P19  | Ad5.P19       | Ad6d24.P19    | H101          |
|------------|-------------|---------------|---------------|---------------|
| Ad1d24.P19 | <b>0.03</b> | 0.30          | <b>0.03</b>   | <b>0.02</b>   |
| Ad2d24.P19 |             | <b>0.0002</b> | 0.42          | 0.09          |
| Ad5.P19    |             |               | <b>0.0002</b> | <b>0.0003</b> |
| Ad6d24.P19 |             |               |               | <b>0.03</b>   |

Table 3: p-values of  $k$

|             | Ad2d24.P19 | Ad5.P19     | Ad6d24.P19  | H101         |
|-------------|------------|-------------|-------------|--------------|
| Ad1d24.P19  | 0.12       | <b>0.01</b> | <b>0.04</b> | <b>0.002</b> |
| Ad2d24.P19  |            | 0.25        | 0.38        | 0.06         |
| Ad5d24d.P19 |            |             | 0.49        | 0.29         |
| Ad6d24.P19  |            |             |             | 0.26         |

Table 4: p-values of  $\delta$

|            | Ad2d24.P19    | Ad5.P19       | Ad6d24.P19    | H101          |
|------------|---------------|---------------|---------------|---------------|
| Ad1d24.P19 | <b>0.0002</b> | <b>0.0002</b> | <b>0.0002</b> | <b>0.0002</b> |
| Ad2d24.P19 |               | 0.30          | 0.25          | <b>0.01</b>   |
| Ad5d24.P19 |               |               | 0.51          | 0.15          |
| Ad6d24.P19 |               |               |               | 0.11          |

Table 5: p-values of  $p$

|            | Ad2d24.P19    | Ad5.P19       | Ad6d24.P19    | H101          |
|------------|---------------|---------------|---------------|---------------|
| Ad1d24.P19 | <b>0.0002</b> | <b>0.0002</b> | <b>0.0004</b> | <b>0.0002</b> |
| Ad2d24.P19 |               | <b>0.0009</b> | <b>0.01</b>   | <b>0.0002</b> |
| Ad5d24.P19 |               |               | <b>0.002</b>  | <b>0.0002</b> |
| Ad6d24.P19 |               |               |               | <b>0.0002</b> |

Table 6: p-values of  $\epsilon$ 

|            | Ad2d24.P19    | Ad5.P19       | Ad6d24.P19    | H101          |
|------------|---------------|---------------|---------------|---------------|
| Ad1d24.P19 | <b>0.0002</b> | 0.40          | <b>0.0002</b> | <b>0.0002</b> |
| Ad2d24.P19 |               | <b>0.0002</b> | <b>0.0003</b> | <b>0.0002</b> |
| Ad5d24.P19 |               |               | <b>0.0002</b> | <b>0.0006</b> |
| Ad6d24.P19 |               |               |               | <b>0.0002</b> |

Table 7: p-values of  $c$ 

|            | Ad2d24.P19    | Ad5.P19       | Ad6d24.P19    | H101          |
|------------|---------------|---------------|---------------|---------------|
| Ad1d24.P19 | <b>0.0005</b> | <b>0.0003</b> | <b>0.001</b>  | <b>0.0002</b> |
| Ad2d24.P19 |               | <b>0.0005</b> | 0.05          | <b>0.0002</b> |
| Ad5d24.P19 |               |               | <b>0.0002</b> | 0.22          |
| Ad6d24.P19 |               |               |               | <b>0.0002</b> |

Table 8: p-values of  $\alpha$ 

|            | Ad2d24.P19   | Ad5.P19      | Ad6d24.P19   | H101         |
|------------|--------------|--------------|--------------|--------------|
| Ad1d24.P19 | <b>0.001</b> | 0.06         | <b>0.001</b> | <b>0.002</b> |
| Ad2d24.P19 |              | <b>0.001</b> | 0.50         | <b>0.004</b> |
| Ad5d24.P19 |              |              | <b>0.002</b> | <b>0.002</b> |
| Ad6d24.P19 |              |              |              | 0.05         |

## References

- [1] Odo Diekmann, JAP Heesterbeek, and Michael G Roberts. The construction of next-generation matrices for compartmental epidemic models. *Journal of the royal society interface*, 7(47):873–885, 2010.
- [2] Daniel Foreman-Mackey. corner.py: Scatterplot matrices in python. *The Journal of Open Source Software*, 1(2):24, jun 2016.
